# Supplementary material for: Akt and SGK protein kinases are required for efficient feeding by macropinocytosis
Source: Oxford University Press journal article supplement (doi:10.1242/jcs.224998), 2019-01-07
Supplement: jcs224998supp.pdf [file jcs224998supp.pdf]

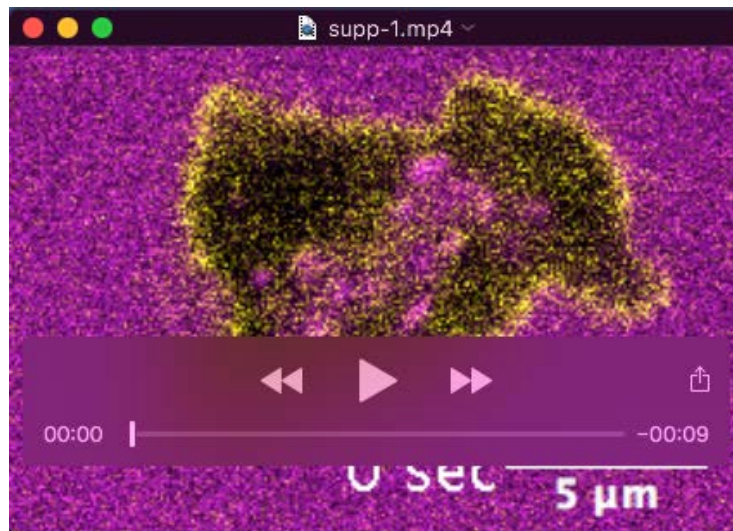

**Movie 1: PkbR1-GFP is present on macropinosomes**

PkbA-/PkbR1- cell overexpressing PkbR1-GFP (yellow) in TRITC-dextran containing media (magenta). PkbR1-GFP is present all over the cell membrane, including the macropinosomatic cup, which is internalised and PkbR1-GFP remains on the endosome for a time after internalisation. Movie was taken at one frame per second on a Zeiss 710 microscope.

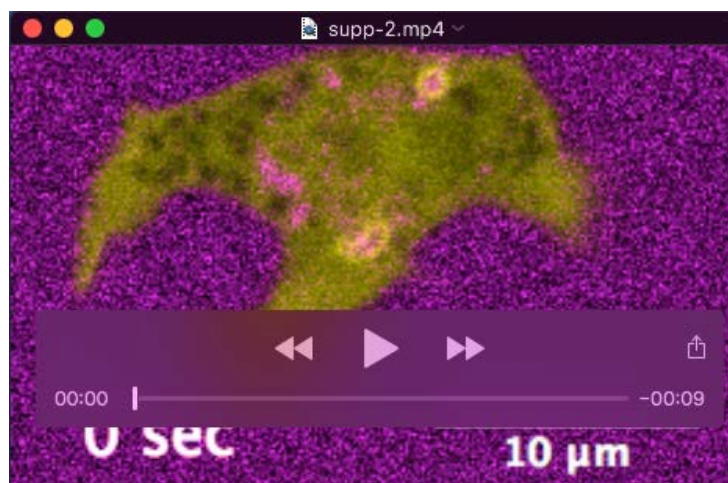

**Movie 2: GFP-PkbA labels macropinosomes**

PkbA-/PkbR1- cell overexpressing GFP-PkbA (yellow) in TRITC-dextran containing media (magenta). GFP-PkbA is recruited to macropinosomatic cups and remains on endosomes for a time after internalisation. Movie was taken at one frame per second on a Zeiss 710 microscope.

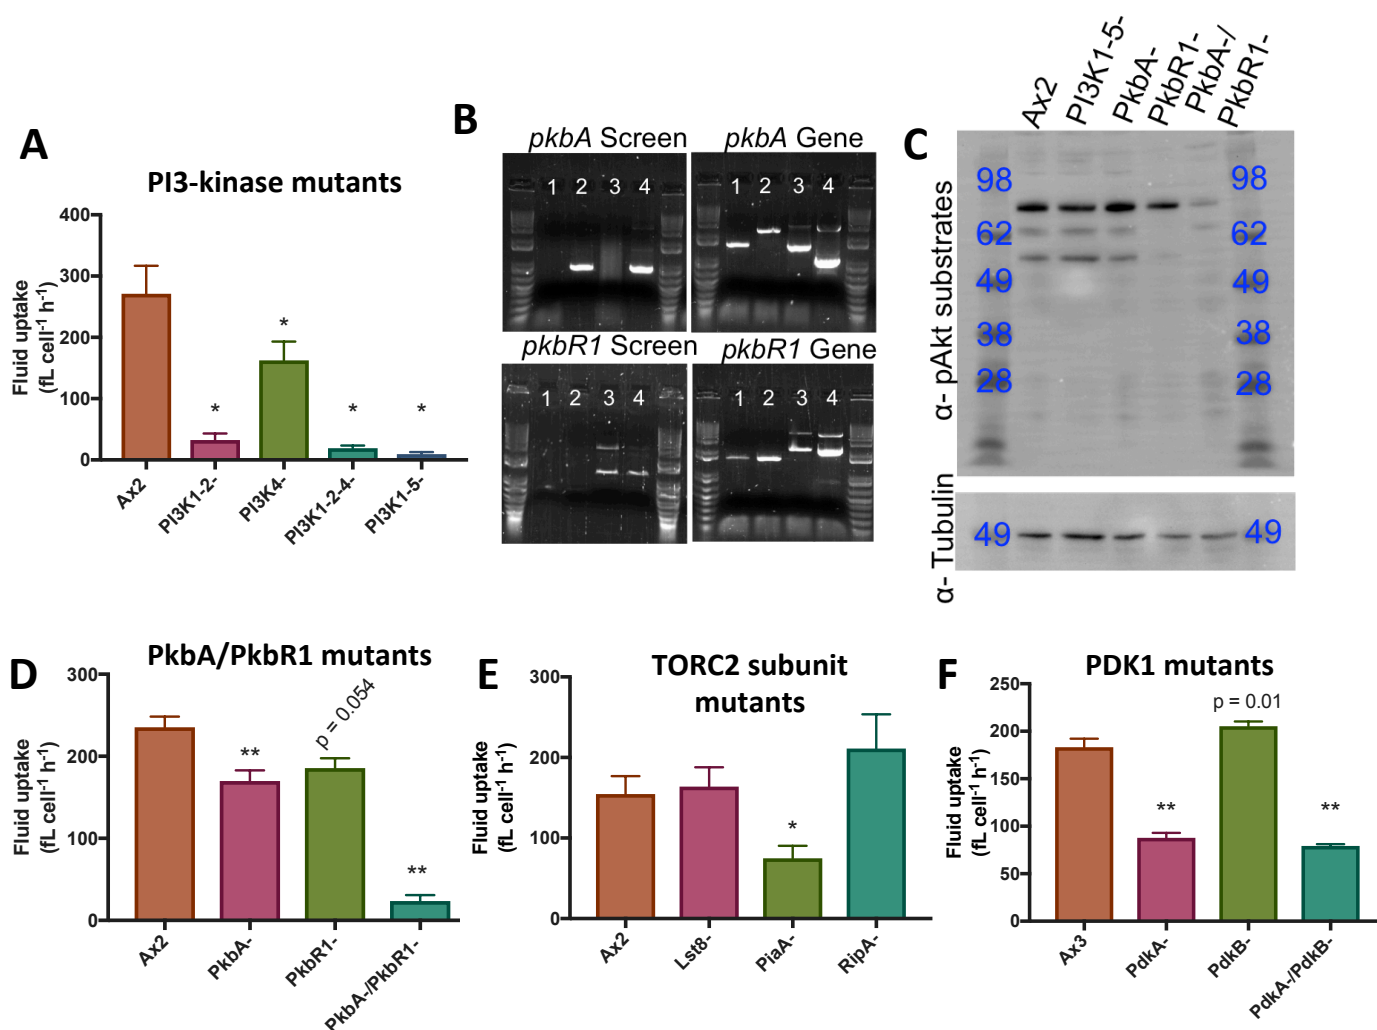

**Figure S1; related to figure 1: Isolation and characterisation of PkbA/PkbR1 mutants and upstream activators**

**A)** PI3-kinase mutants had similar fluid uptake defects after 24 h incubation in HL5 medium + 10% FBS compared to HL5 alone (Figure 1A). **B)** PCRs confirming the knockout of PkbA and PkbR1. The “gene” PCRs go across the full length of the gene, and are altered in length in the mutants while the “screen” PCRs are only visible in the mutants. Ax2 is shown in lane 1, PkbA- in lane 2, PkbR1- in lane 3 and PkbA-/PkbR1- in lane 4. Genomic DNA was prepared using a Zymogen gDNA miniprep kit according to the manufacturers instructions. **C)** PkbA-/PkbR1- mutants have negligible Akt substrate phosphorylations, while PI3K1-5- and single mutants are largely unaffected at a global level. **D)** Fluid uptake of PkbA/PkbR1 mutants was measured by TRITC-dextran addition for 1 h after 24 h incubation in HL5 medium + 10% FBS following harvesting from bacteria for PkbA/PkbR1 mutants, with similar fluid uptake defects observed as when they were incubated in HL5 alone (Figure 1B). Fluid uptake was generally improved, compared to HL5 medium alone (Figures 1C&1E) by addition of 10% FBS for **E)** TORC2 subunit mutants and **F)** PDK1 mutants.

For fluid uptake determination, cells were harvested from bacteria and inoculated in HL5 medium + 10% FBS for 24 h, after which TRITC-Dextran was added for 1 h. Cells were washed in ice-cold KK<sub>2</sub> buffer, detached and analysed by flow cytometry. Graphs show mean ± SEM, n = 3. p ≤ 0.1 is specified, \* p < 0.05, \*\* p < 0.01 compared to parent strain. For western blots, cells were incubated in HL5 medium + 10% FBS for 24 h before protein was harvested and lysate from approximately 2x10<sup>5</sup> cells run out. The size of the protein markers are shown in kDa in blue text.

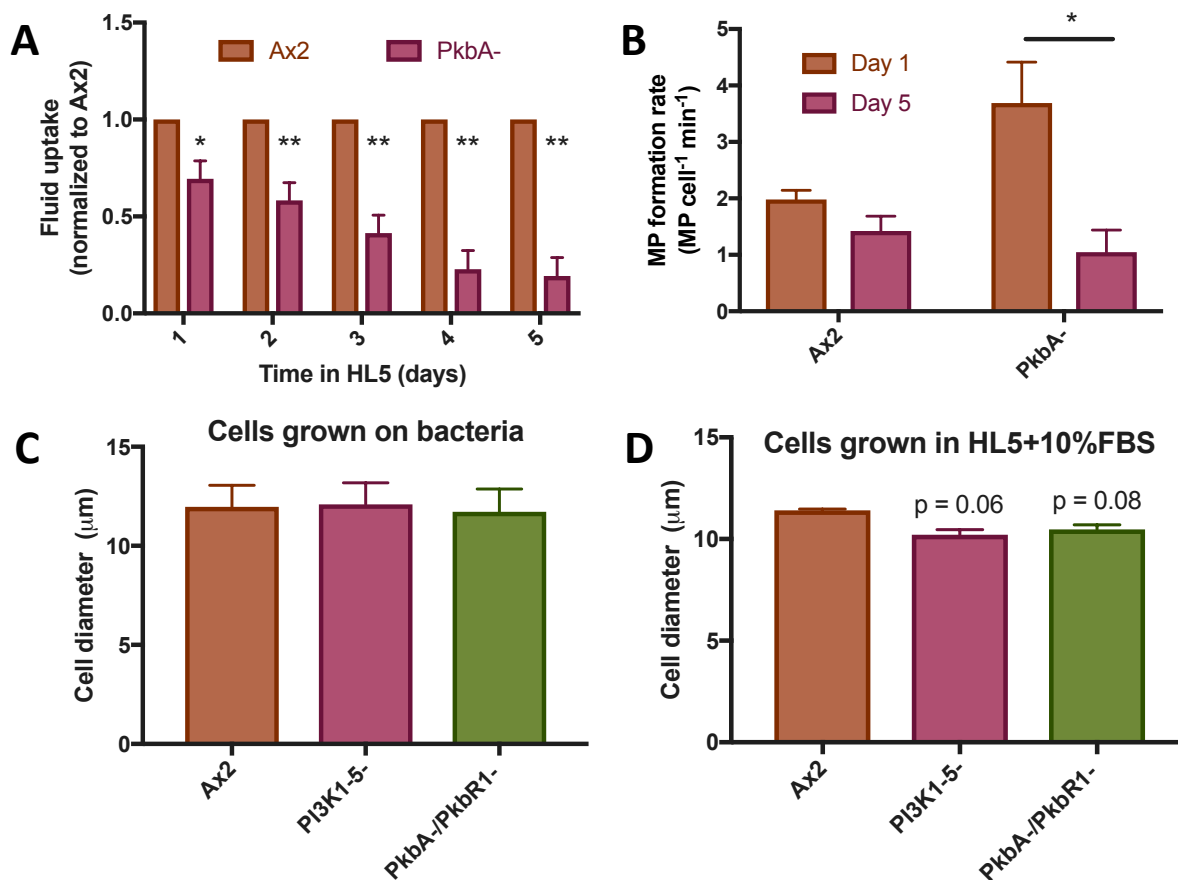

**Figure S2; related to figure 2: PkbA- macropinosytosis over time and PkbA-/PkbR1- cell size**

**A**) Fluid uptake decreases over time in PkbA- cells, accounting for the unexpected growth defect (Figure 2A). Ax2 and PkbA- cells were harvested from bacteria and inoculated into HL5 in 96-well plates at various densities, to account for cell proliferation, and fluid uptake measured every day for 5 days. **B**) The decrease in fluid uptake over time in PkbA- cells is due to a decrease in macropinosome formation. Ax2 and PkbA- cells were harvested from bacteria into HL5 for 1 or 5 days, after which their macropinosome formation rate was measured by pulsing cells for 1 min with FITC-dextran, fixing them and counting the number of macropinosomes by microscopy. **C**) PI3K1-5- and PkbA-/PkbR1- cells are the same size as Ax2 cells when cultivated on bacteria, where there is no proliferation defect (n = 4). Cells were grown on SM agar, washed and inoculated into KK<sub>2</sub>MC + *Ka* bacteria for 24 h before being washed, resuspended in KK<sub>2</sub>MC and size measured using an Eclipse (Sony iCyt) **D**) The PI3K1-5- and PkbA-/PkbR1- cell diameter is slightly decreased after they have been incubated in HL5 medium + 10% FBS for 24 h. Cells were prepared as in C. Graphs show mean ± SEM, n = 3 unless stated, p < 0.1 is stated, \* p < 0.05, \*\* p < 0.01 compared to Ax2.

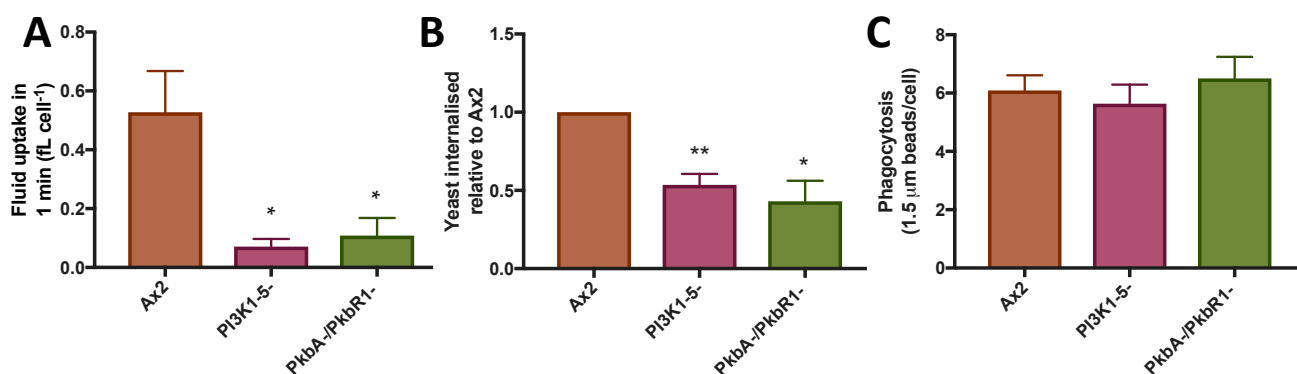

**Figure S3; related to figure 4: PI3K1-5- and Akt- cells do not have increased endosome recycling, but do have reduced large particle uptake**

**A)** The fluid uptake decrease observed in PI3K1-5- and PkbA-/PkbR1- cells is apparent after 1 min. Cells were harvested from bacteria and incubated in HL5 medium + 10% FBS for 24 h. The medium was then swapped to SUM for  $\geq 1.5$  h to minimise background fluorescence. Fluid uptake was then measured using 5 mg/ml TRITC-Dextran ( $n = 4$ ). As this decrease is greater than for the macropinosome formation rate (Figure 4A), increased endosome recycling cannot account for the fluid uptake defects. **B)** Yeast endocytosis is reduced in PI3K1-5- and PkbA-/PkbR1- cells, consistent with these mutants having smaller macropinosomatic patches (Figure 4C). Cells were harvested from bacterial SM agar plates, washed and incubated with fluorescent yeast for 1 h, after which the non-phagocytosed yeast fluorescence was quenched with trypan blue. Internalised fluorescence was measured on a fluorimeter and set relative to Ax2. **C)** Phagocytosis of 1.5  $\mu\text{m}$  beads is unaffected in the PI3K1-5- and PkbA-/PkbR1- mutants, indicating there is no general phagocytosis defect in these cells. Cells were harvested as in B then distributed into 96-well plates in  $\text{KK}_2\text{MC}$  and allowed to settle. 1.5  $\mu\text{m}$  beads were added to  $1 \times 10^8$  beads/ml for 20 min, after which the cells were washed, detached and analysed by flow cytometry. Graphs show mean  $\pm$  SEM,  $n = 3$  unless otherwise stated, \*  $p < 0.05$ , \*\*  $p < 0.01$  compared to Ax2.

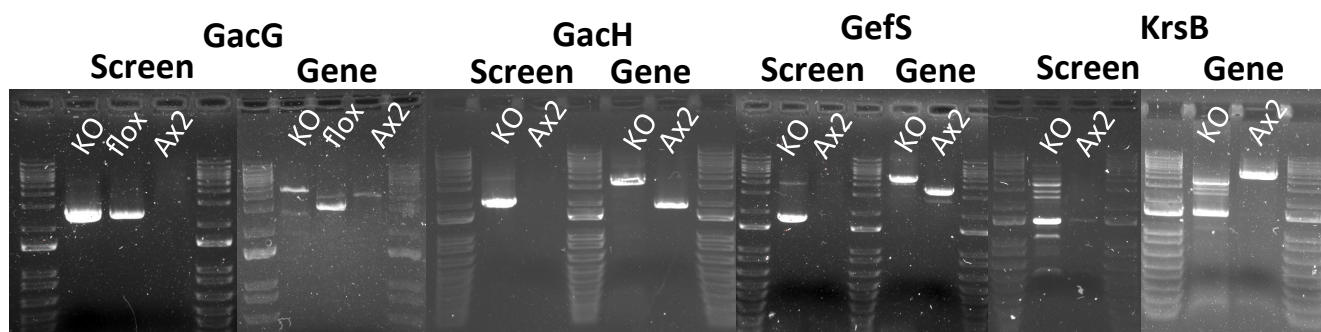

**Figure S4; related to figure 5: Knockout of PkbA/PkbR1 targets**

PCRs confirming the knockout of proteins identified in the phosphoproteomic screen. “Screen” PCRs only have a product when the gene is knocked out, while the “Gene” PCRs are across the full-length gene and have altered size in the mutants. Genomic DNA was prepared using a Zymogen gDNA miniprep kit according to the manufacturers instructions.

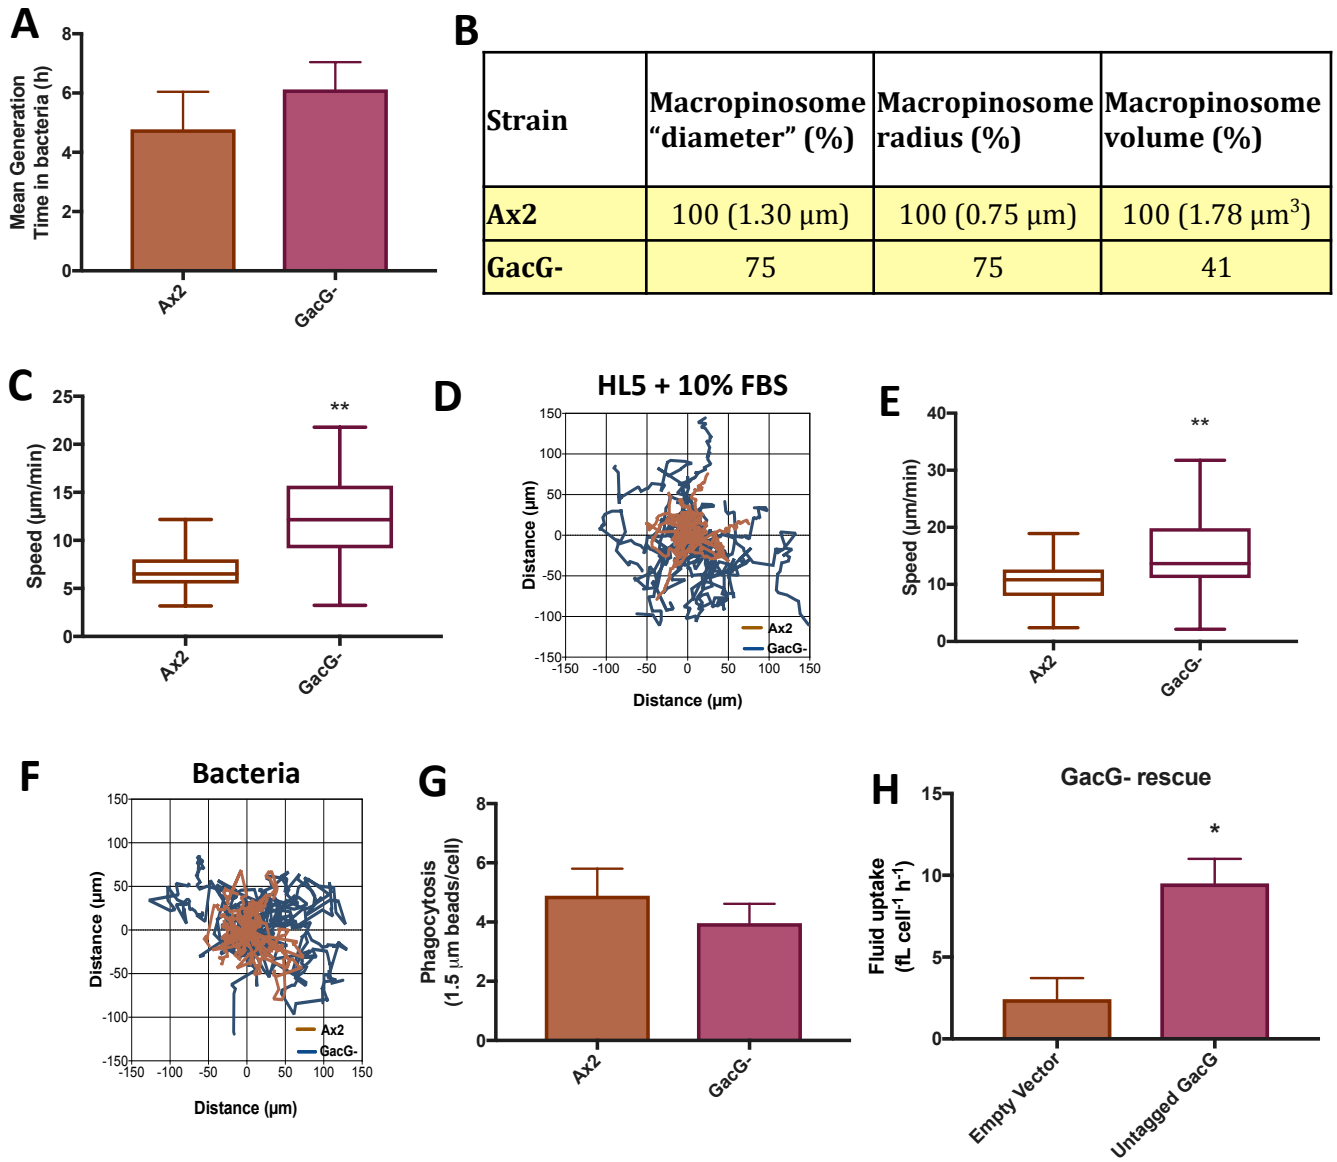

**Figure S5; related to figure 6: GacG- cell proliferation, endocytosis and movement (previous page)**

**A)** GacG- cells proliferate normally on bacteria. Cells were harvested from growth on SM bacterial plates and incubated in  $20 \text{ OD}_{600 \text{ nm}} \text{ Ka}$  in  $\text{KK}_2\text{MC}$  at  $22^\circ\text{C}$ , 220 rpm. Cell density was determined at regular intervals using a hemacytometer. **B)** Summary table of Figure 6C showing the average values as a percentage of the parent control. The measured diameter of the macropinosomes tends to halfway between the equator and the poles of the macropinosome (assuming the observed diameters were obtained from random sections of perfectly spherical macropinosomes). The average radius is calculated by multiplying the median observed diameter by  $\tan(30^\circ)$ , and the volume calculated from that. As macropinosomes are often not perfect spheres when they are formed, and sampling at the periphery of macropinosomes is technically challenging, these values are approximate. **C)** GacG- cells move faster than Ax2 cells when grown axenically in HL5 medium + 10% FBS. The speed of 120 randomly moving cells was measured over 20 minutes using a Zeiss 700 series microscope. **D)** The tracks of 20 cells incubated in HL5 medium + 10% FBS for 24 h, then filmed randomly moving using a Zeiss 700 series microscope from Figure 6G are shown. **E)** GacG- cells move faster than Ax2 cells when grown on bacteria. The speed of 120 randomly moving cells was measured over 20 minutes using a Zeiss 700 series microscope. **F)** The tracks of 20 cells from E are shown. **G)** Phagocytosis of  $1.5 \mu\text{m}$  beads is unaffected in the GacG- mutant, like the PkbA-/PkbR1- and PI3K1-5- mutants, indicating there is no general phagocytosis defect in these cells. Cells were harvested from SM plates, distributed into 96-well plates in  $\text{KK}_2\text{MC}$  and allowed to settle.  $1.5 \mu\text{m}$  beads were added to  $1 \times 10^8$  beads/ml for 20 min, after which the cells were washed, detached and analysed by flow cytometry. **H)** The fluid uptake defect of GacG- cells can be rescued by overexpression of untagged GacG, albeit to far below the levels of Ax2. GacG- cells were transformed with an empty expression vector, or the vector containing GacG. Transformants were selected for on bacteria, then transferred to HL5 medium + 10% FBS and fluid uptake was assessed 24-72h after transfer.

Bar graphs show mean  $\pm$  SEM, box plots show the minimum and maximum values, the box is the 25<sup>th</sup> to 75<sup>th</sup> percentile and the middle line shows the median.  $n = 3$  unless specified. \*  $p < 0.05$ , \*\*  $p < 0.01$  compared to Ax2 or the control.

**Table S1: Phosphopeptide abundance in Akt mutant cells**

The phosphopeptides identified by TMT mass spectrometry and their abundance in PkbA/PkbR1 mutants relative to Ax2. Strains were harvested from bacterial plates, washed free of bacteria and incubated in HL5 medium + 10% FBS for 24 h at 22 °C, 220 rpm at 1-2x10<sup>6</sup> cells/ml. Cells were then washed free of medium, resuspended in KK<sub>2</sub>MC buffer and treated for 30 minutes with DMSO or 100 μM LY294002 before protein was harvested, TMT tagged, phosphopeptides purified and analysed by mass spectrometry. The abundance of each phosphopeptide in each condition was measured relative to Ax2. Condition 1- Ax2, condition 2- PkbA-, condition 3- PkbR1-, condition 4- PkbR1- + LY294002, condition 5- PkbA-/PkbR1-.

[Click here to Download Table S1](#)

| Uniprot ID | Dictybase ID | Phosphosite(s)     | Most likely kinase | Predicted function          |
|------------|--------------|--------------------|--------------------|-----------------------------|
| P0CD60     | FrmC         | S306               | PKA                | Cytoplasm/membrane linker   |
| P28178     | PkbR1        | T432 ; S449 ; T470 | PKC ; GSK3 ; GSK3  | Protein Kinase              |
| Q00766     | GlpV         | T10 ; T13          | Cdc2 ; PKC         | Glycogen phosphorylase      |
| Q54B11     | DDB_G0293990 | S230               | PKA                | Unknown                     |
| Q54DP0     | DDB_G0292106 | S212               | PKA                | Endosomal transport         |
| Q54ET0     | GrlE         | T765 ; S770        | PKC ; CKII         | GPCR                        |
| Q54GL1     | GDE1         | S271               | PKA                | Phosphodiesterase           |
| Q54H00     | DDB_G0289807 | S531               | PKA                | Protein/Lipid phosphatase   |
| Q54HC8     | DDB_G0289551 | S123               | DNAPK              | Membrane protein            |
| Q54IA6     | DDB_G0288895 | T395               | PKG                | Unknown                     |
| Q54LB8     | Vps13A       | S1685              | PKA                | Vacuolar sorting            |
| Q54P47     | NdrC         | S12 ; S529         | RSK ; GSK3         | Protein Kinase              |
| Q54QE5     | DDB_G0283919 | S465               | GSK3               | Protein Phosphatase         |
| Q54QI2     | DDB_G0283821 | S750               | PKA                | Proten Kinase               |
| Q54R82     | MkkA         | S488               | CAM-II             | Proten Kinase               |
| Q54RZ3     | DDB_G0282823 | S694               | RSK                | Unknown                     |
| Q54SC3     | DDB_G0282779 | S495               | PKC                | Transmembrane protein       |
| Q54SL6     | GacQ         | T272               | Cdc2               | RhoGAP                      |
| Q54U31     | ShkD         | S267               | PKA                | Protein Kinase              |
| Q54VX2     | GxcS         | S317               | RSK                | RhoGEF                      |
| Q54WH7     | DDB_G0279653 | S60                | PKA                | Unknown                     |
| Q552C1     | DDB_G0276181 | S268               | PKA                | Protein Kinase              |
| Q553Q6     | DDB_G0275401 | S513               | DNAPK              | Unknown                     |
| Q555M9     | DDB_G0274847 | S989               | Cdc2               | Nucleotidyltransferase      |
| Q55DM1     | LvsA         | S93                | PKA                | Contractile Vacuole protein |
| Q6XHA6     | Roco10       | S1671              | Cdc2               | LRRK family protein kinase  |
| Q86C65     | Tor          | S454               | PKA                | Protein Kinase              |
| Q86KF9     | SgkA         | S424               | Cdc2               | Sphingosine Kinase          |
| Q54TT8     | DDB_G0281503 | S938               | PKA                | Unknown                     |

**Table S2: Candidate proteins involved in macropinocytosis not phosphorylated by PkbA/PkbR1**  
 Phosphorylated proteins that were less abundant in PkbA/PkbR1 mutants (>4-fold decreased in PkbA-/PkbR1- cells, >2-fold in PkbR1- + LY294002) compared to Ax2 which did not have an Akt consensus motif. Cells were incubated for 24 h in HL5 medium + 10% FBS at 22 °C, 220 rpm to allow macropinocytosis upregulation, then washed and resuspended in KK<sub>2</sub>MC and treated with 100 μM LY294002 inhibitor or DMSO for 30 min. Proteins were then precipitated, labelled with TMT tags, enriched for phosphopeptides and the abundance of each compared using mass spectrometry.



| GO molecular function term                                  | Proteins matching terms (Total proteome) | Proteins matching terms (Akt targets) | Expected proteins | Fold Enrichment | Raw P-value | False Discovery Rate |
|-------------------------------------------------------------|------------------------------------------|---------------------------------------|-------------------|-----------------|-------------|----------------------|
| clathrin light chain binding (GO:0032051)                   | 2                                        | 1                                     | 0                 | > 100           | 0.0035      | 1.56                 |
| clathrin adaptor activity (GO:0035615)                      | 2                                        | 1                                     | 0                 | > 100           | 0.0035      | 1.30                 |
| endocytic adaptor activity (GO:0098748)                     | 2                                        | 1                                     | 0                 | > 100           | 0.0035      | 1.12                 |
| phosphatidylinositol-3,4-bisphosphate binding (GO:0043325)  | 3                                        | 1                                     | 0                 | > 100           | 0.0047      | 1.30                 |
| phosphatidylinositol-3,5-bisphosphate binding (GO:0080025)  | 3                                        | 1                                     | 0                 | > 100           | 0.0047      | 1.16                 |
| cargo receptor activity (GO:0038024)                        | 4                                        | 1                                     | 0                 | > 100           | 0.0059      | 1.30                 |
| protein-containing complex scaffold activity (GO:0032947)   | 8                                        | 1                                     | 0.01              | > 100           | 0.0105      | 1.46                 |
| clathrin binding (GO:0030276)                               | 10                                       | 1                                     | 0.01              | 84.9            | 0.0129      | 1.68                 |
| molecular adaptor activity (GO:0060090)                     | 14                                       | 1                                     | 0.02              | 60.64           | 0.0175      | 1.76                 |
| protein binding, bridging (GO:0030674)                      | 14                                       | 1                                     | 0.02              | 60.64           | 0.0175      | 1.69                 |
| Rac GTPase binding (GO:0048365)                             | 15                                       | 1                                     | 0.02              | 56.6            | 0.0187      | 1.66                 |
| phosphatidylinositol bisphosphate binding (GO:1902936)      | 15                                       | 1                                     | 0.02              | 56.6            | 0.0187      | 1.59                 |
| microtubule motor activity (GO:0003777)                     | 17                                       | 1                                     | 0.02              | 49.94           | 0.0210      | 1.72                 |
| phosphatidylinositol phosphate binding (GO:1901981)         | 31                                       | 1                                     | 0.04              | 27.39           | 0.0370      | 1.91                 |
| Rho GTPase binding (GO:0017048)                             | 68                                       | 2                                     | 0.08              | 24.97           | 0.0030      | 1.65                 |
| motor activity (GO:0003774)                                 | 34                                       | 1                                     | 0.04              | 24.97           | 0.0404      | 1.99                 |
| microtubule binding (GO:0008017)                            | 44                                       | 1                                     | 0.05              | 19.3            | 0.0517      | 2.44                 |
| Rho guanyl-nucleotide exchange factor activity (GO:0005089) | 46                                       | 1                                     | 0.05              | 18.46           | 0.0539      | 2.39                 |
| tubulin binding (GO:0015631)                                | 53                                       | 1                                     | 0.06              | 16.02           | 0.0617      | 2.68                 |
| phosphatidylinositol binding (GO:0035091)                   | 54                                       | 1                                     | 0.06              | 15.72           | 0.0628      | 2.68                 |
| guanyl-nucleotide exchange factor activity (GO:0005085)     | 114                                      | 2                                     | 0.13              | 14.89           | 0.0080      | 1.47                 |
| GTPase activator activity (GO:0005096)                      | 116                                      | 2                                     | 0.14              | 14.64           | 0.0082      | 1.41                 |
| GTPase regulator activity (GO:0030695)                      | 117                                      | 2                                     | 0.14              | 14.51           | 0.0084      | 1.33                 |
| nucleoside-triphosphatase regulator activity (GO:0060589)   | 124                                      | 2                                     | 0.15              | 13.69           | 0.0094      | 1.38                 |
| Ras guanyl-nucleotide exchange factor activity (GO:0005088) | 64                                       | 1                                     | 0.08              | 13.27           | 0.0738      | 2.92                 |
| GTPase binding (GO:0051020)                                 | 195                                      | 3                                     | 0.23              | 13.06           | 0.0015      | 1.08                 |
| phospholipid binding (GO:0005543)                           | 74                                       | 1                                     | 0.09              | 11.47           | 0.0847      | 3.13                 |
| Ras GTPase binding (GO:0017016)                             | 149                                      | 2                                     | 0.18              | 11.4            | 0.0132      | 1.63                 |
| small GTPase binding (GO:0031267)                           | 149                                      | 2                                     | 0.18              | 11.4            | 0.0132      | 1.54                 |
| phosphoprotein phosphatase activity (GO:0004721)            | 76                                       | 1                                     | 0.09              | 11.17           | 0.0869      | 3.11                 |
| enzyme activator activity (GO:0008047)                      | 155                                      | 2                                     | 0.18              | 10.95           | 0.0142      | 1.58                 |
| molecular function regulator (GO:0098772)                   | 326                                      | 4                                     | 0.38              | 10.42           | 0.0005      | 1.06                 |

**Table S3; related to table 1 and figure 5: Terms enriched by GO analysis in the Akt target proteins**

The 16 proteins identified as being phosphorylated at an Akt consensus sequence with a reduced abundance by mass spectrometry (Table 1) were subject to GO analysis against the *Dictyostelium discoideum* proteome. The terms with a >10-fold enrichment are shown here. Statistical analysis was performed using fishers exact test.

|                        | Uniprot ID | Dictybase ID | Phosphosite(s) | Most likely kinase | Predicted function |
|------------------------|------------|--------------|----------------|--------------------|--------------------|
| <b>PkbA dependent</b>  | Q55FS2     | KrsB         | S505           | Akt                | Protein Kinase     |
|                        | Q6S004     | Kif6         | S1016          | Akt                | Kinesin            |
| <b>PkbR1 dependent</b> | Q54YK2     | DDB_G0278629 | S679           | Akt                | Unknown            |
|                        | Q8SSW7     | GefS         | S623           | Akt                | RasGEF             |

**Table S4 related to table 1 and figure S4: PkbA and PkbR1 dependent phosphorylations**

The proteins with phospho-sites which appear to be dependent on either PkbA or PkbR1 specifically. Phosphopeptides that had an Akt recognition motif were identified which were >4-fold reduced compared to the Ax2 control in either PkbA- cells (PkbA-dependent phosphorylations) or PkbR1- cells (PkbR1-dependent phosphorylations).

| Parent          | Mutation(s)           | Resistance  | Strain reference(s) | Source                         |
|-----------------|-----------------------|-------------|---------------------|--------------------------------|
| Ax2 (Ka)        | -                     | -           | Ax2 (Ka)            | Rob Kay                        |
| Ax2 (Ka)        | <i>pi3k1-/-2-</i>     | Blasticidin | HM1141              | (Hoeller and Kay, 2007)        |
| Ax2 (Ka)        | <i>pi3k4-</i>         | Blasticidin | HM1148              | (Hoeller and Kay, 2007)        |
| Ax2 (Ka)        | <i>pi3k1-/-2-/-4-</i> | Blasticidin | HM1159              | (Hoeller and Kay, 2007)        |
| Ax2 (Ka)        | <i>pi3k1-5-</i>       | Blasticidin | HM1200              | (Hoeller and Kay, 2007)        |
| Ax2 (Ka)        | <i>pkbA-</i>          | G418        | HM1815-7            | This work                      |
| Ax2 (Ka)        | <i>pkbA-</i>          | -           | HM1818              | This work                      |
| Ax2 (Ka)        | <i>pkbR1-</i>         | G418        | HM1832-4            | This work                      |
| Ax2 (Ka)        | <i>pkbR1-</i>         | -           | HM1835              | This work                      |
| Ax2 (Ka)        | <i>pkbA-/pkbR1-</i>   | G418        | HM1850-2            | This work                      |
| Ax2 (Ka)        | <i>pkbA-/pkbR1-</i>   | -           | HM1853              | This work                      |
| Ax2 (Ka)        | <i>lst8-</i>          | Blasticidin | HM1415              | Louise Fets                    |
| Ax2 (Ka)        | <i>piaA-</i>          | Blasticidin | HM1461              | Louise Fets                    |
| Ax2 (Ka)        | <i>ripA-</i>          | Blasticidin | HM1364              | Oliver Hoeller                 |
| Ax3 (Devreotes) | -                     | -           | Ax3 (Devreotes)     | Peter Devreotes                |
| Ax3 (Devreotes) | <i>pdkA-</i>          | Blasticidin | HM1950              | (Kamimura and Devreotes, 2010) |
| Ax3 (Devreotes) | <i>pdkB-</i>          | Blasticidin | HM1951              | (Kamimura and Devreotes, 2010) |
| Ax3 (Devreotes) | <i>pdkA-/B-</i>       | Blasticidin | HM1952              | (Kamimura and Devreotes, 2010) |
| Ax2 (Ka)        | <i>gacG-</i>          | G418        | HM1945-9            | This work                      |
| Ax2 (Ka)        | <i>gacG-</i>          | -           | HM1956              | This work                      |
| Ax2 (Ka)        | <i>gacH-</i>          | G418        | HM1942-4            | This work                      |
| Ax2 (Ka)        | <i>krsB-</i>          | G418        | HM1970-3            | This work                      |
| Ax2 (Ka)        | <i>gefS-</i>          | G418        | HM1953-5            | This work                      |
| Ax4 (Kuspa)     | -                     | -           | Ax4 (Kuspa)         | Adam Kuspa                     |
| Ax4 (Kuspa)     | <i>scaA-</i>          | Blasticidin | V10285              | (Sawai et al., 2008)           |

**Table S5: Strains used in this study**

The strains used in this study. Where there is more than one strain of a particular mutant, the phenotype presented in the text is representative of all the strains. Where strains have been cured of their resistance by cre-lox recombination, the data represented in this work is of the strain without a resistance cassette.

**Hoeller, O. and Kay, R. R.** (2007). Chemotaxis in the absence of PIP3 gradients. *Curr. Biol.* **17**, 813-817.

**Kamimura, Y. and Devreotes, P. N.** (2010). Phosphoinositide-dependent protein kinase (PDK) activity regulates phosphatidylinositol 3,4,5-trisphosphate-dependent and -independent protein kinase B activation and chemotaxis. *J. Biol. Chem.* **285**, 7938-46.

**Sawai, S., Guan, X. J., Kuspa, A. and Cox, E. C.** (2008). High-throughput analysis of spatio-temporal dynamics in *Dictyostelium*. *Genome Biol.* **8**, R144 (15 pages).

| Vector  | Markers                                                   | Selection  |
|---------|-----------------------------------------------------------|------------|
| pDM1140 | PakB CRIB-GFP (active Rac), Raf1 RBD-mCherry (active Ras) | G418       |
| pDM1383 | HSPC300-GFP (SCAR), Raf1 RBD-mCherry (active Ras)         | G418       |
| pDM1489 | Cre Recombinase                                           | Hygromycin |
| pPI157  | Raf1 RBD-GFP (active Ras)                                 | G418       |
| pPI321  | Raf1 RBD-GFP (active Ras), Lifeact-mCherry (F-actin)      | G418       |
| pTW001  | Raf1 RBD-GFP (active Ras), PTEN-mCherry                   | G418       |
| pTW002  | Raf1 RBD-GFP(active Ras), PH PkgE-mCherry (PIP3)          | G418       |
| pDM1207 | Empty Vector control                                      | G418       |
| pTW003  | GFP-PkbA                                                  | G418       |
| pTW044  | GFP-PkbA T435A                                            | G418       |
| pTW046  | GFP-PkbA T278A                                            | G418       |
| pDM1209 | Empty Vector control                                      | G418       |
| pTW008  | PkbR1-GFP                                                 | G418       |
| pTW063  | PkbR1-GFP T470A                                           | G418       |
| pTW065  | PkbR1-GFP T309A                                           | G418       |
| pTW032  | GacG-GFP                                                  | G418       |
| pPI582  | GFP-GacG                                                  | G418       |
| pDM1203 | Empty Vector control                                      | G418       |
| pTW058  | GacG                                                      | G418       |

**Table S6: Over-expression vectors used in this study**

The overexpression vectors used in this study. These were made based in the pDM expression system (Veltman et al., 2009).

**Veltman, D. M., Akar, G., Bosgraaf, L. and Van Haastert, P. J.** (2009). A new set of small, extrachromosomal expression vectors for *Dictyostelium discoideum*. *Plasmid* **61**, 110-118.

| Vector name | Target gene  | Linearising digest            | Selection marker | Construction details                                                                                                       |
|-------------|--------------|-------------------------------|------------------|----------------------------------------------------------------------------------------------------------------------------|
| pPkbAKO     | <i>pkbA</i>  | SmaI                          | G418             | G418, 5' and 3' KO arms amplified and then joined by PCR. Product was cloned into pJet1.2 (Thermo-Fisher)                  |
| pPkbR1KO    | <i>pkbR1</i> | SmaI                          | G418             | G418, 5' and 3' KO arms amplified and then joined by PCR. Product was cloned into pJet1.2 (Thermo-Fisher)                  |
| pGacGKO     | <i>gacG</i>  | BamHI & SpeI                  | G418             | Gene amplified from Ax2 DNA and cloned into pJet1.2 (Thermo-Fisher). Digested with EcoRV and a G418 EcoRV digest inserted. |
| pGacHKO     | <i>gacH</i>  | BamHI & NheI (partial digest) | G418             | Gene amplified from Ax2 DNA and cloned into pJet1.2 (Thermo-Fisher). Digested with EcoRV and a G418 EcoRV digest inserted. |
| pGefSKO     | <i>gefS</i>  | BglII/SpeI                    | G418             | Gene amplified from Ax2 DNA and cloned into pJet1.2 (Thermo-Fisher). Digested with EcoRV and a G418 EcoRV digest inserted. |
| pKrsBKO     | <i>krsB</i>  | PvuI                          | G418             | Gene amplified from Ax2 DNA and cloned into pJet1.2 (Thermo-Fisher). Digested with EcoRV and a G418 EcoRV digest inserted. |

**Table S7: Knockout vectors used in this study**

The knockout vectors used in this study and how they were made. The resistance cassette was obtained from pDM vectors.

**Table S8: Primers used in this study (overleaf)**

The primers used in this study, and what they were used to amplify. Restriction enzyme sites incorporated into the sequences are shown in lower case, while overlapping primer sequences are shown in lower case and italicised. Introduced point mutations are shown in bold.

| PCR product                             | Primer 1 name | Primer 2 name | Primer 1 sequence                               | Primer 2 sequence                                  |
|-----------------------------------------|---------------|---------------|-------------------------------------------------|----------------------------------------------------|
| <i>pkbA</i> gene                        | pkbA_F        | pkbA_R        | agatctATGTCAACAGCACCAATTAAA                     | actagtTTATCTTAAATGTTTCAGATTC                       |
| <i>pkbR1</i> gene                       | pkbR1_F       | pkbR1_R       | agatctATGGGAAAAGGACAAAGTAAA                     | actagtATCCTTTAAGATTGAATCAGC                        |
| <i>gacG</i> gene                        | gacG_F        | gacG_R        | ggatccATGGCGTCAATATTTTAAATA<br>AAAAAAC          | actagtCTCTTCAACAATATCAGTTAAAG<br>AAGG              |
| <i>gacH</i> gene                        | gacH_F        | gacH_R        | agatctATGAGTGGTGTAGGAGGTGAAT<br>CAGTAC          | gctagcATTATCATAAAAATAATTATAAT<br>TTTCAATTAATAAAG   |
| <i>krsB</i> gene                        | krsB_F        | krsB_R        | ggatccATGGAGGAAAAGTGGTCAAC                      | aagctagcATTATTATAAAAAATCTAAATC<br>AAATTCTGAATAAAT  |
| <i>gefS</i> gene                        | gefS_F        | gefS_R        | agatctATGGGAGAAGTAAGTTTAATCG<br>G               | actagtCTTTGGTTCGAGAGCAATTGATA                      |
| pDM<br>resistance<br>cassette           | oDM1015       | oDM1016       | CTTCAGTAGGCAGAGCTATC                            | CAGCTTGATACTCCAGTAG                                |
| <i>pkbA</i> KO 5'<br>arm                | pkbA_5'F      | pkbA_5'R      | cccgggCCAAACCACAACAATATTCGCA<br>TAA             | gatagctctgcctactgaagTCCATTAACCT<br>TTTCTTACGATCAGA |
| <i>pkbA</i> KO 3'<br>arm                | pkbA_3'F      | pkbA_3'R      | ctactggagtatccaagctgTTGACACCAACC<br>GACAAAACCTG | cccgggTCTTAAATGTTTCAGATTCAGCGA<br>CA               |
| <i>pkbR1</i> KO 5'<br>arm               | pkbR1_5'F     | pkbR1_5'R     | cccgggTTTAATTACCACACTGTCACATA<br>TTTCTATAAG     | gatagctctgcctactgaagTTGATAAAAGAC<br>TTGGAACATAAAG  |
| <i>pkbR1</i> KO 3'<br>arm               | pkbR1_3'F     | pkbR1_3'R     | ctactggagtatccaagctgGTCCTTCATCTT<br>CATCATCAT   | cccgggACTCTCTTTCTCACACCAATAAC<br>AC                |
| <i>pkbA</i> screen                      | pkbA_ExtR     | oDM1014       | TTTTACCAAAGACGGAACCTTATTCTA<br>AC               | CTACTGGAGTATCCAAGCTG                               |
| <i>pkbR1</i> screen                     | pkbR1_ExtR    | oDM1014       | cccgggCACAACCAAATAAAAGTATTC<br>ATCATGTC         | CTACTGGAGTATCCAAGCTG                               |
| <i>gacG</i> screen                      | gacG_5F4      | oPI236        | ATTACACATATATACATAAAATATTCA<br>AAACCACAC        | atctcgAGAGTAGTATAAATTCGTATAGC<br>ATAC              |
| <i>gacH</i> screen                      | gacH_5F1      | oPI236        | TAAAAAGAGGGTGTAAATTGAAATTTG                     | atctcgAGAGTAGTATAAATTCGTATAGC<br>ATAC              |
| <i>krsB</i> screen                      | krsB_Ext3'    | oPI236        | GGTAATTTCTCTTTTGAAGCCATT                        | atctcgAGAGTAGTATAAATTCGTATAGC<br>ATAC              |
| <i>gefS</i> screen                      | gefS_Ext5'    | oPI236        | TTTAAATATACTTCACTCTCTCCAAG<br>T                 | atctcgAGAGTAGTATAAATTCGTATAGC<br>ATAC              |
| <i>pkbA</i> T278A<br>point<br>mutation  | pkbA_T278A_F  | pkbA_T278_R   | <b>GCT</b> TTCTGTGGTACTCTGAATATTTA<br>GC        | ACCAGTTTTGTGGTGGTGTCAATAG<br>ACCCTC                |
| <i>pkbA</i> T435A<br>point<br>mutation  | pkbA_T435A_F  | pkbA_T435_R   | <b>GCA</b> TATGTCGCTGAATCTGAACATTTA<br>AG       | AAATCCTTCAAATCTTTTGTGTGCGG                         |
| <i>pkbR1</i> T309A<br>point<br>mutation | pkbA_T309A_F  | pkbA_T309_R   | <b>GCT</b> TTCTGTGGTACACCAGAGTATTTA<br>GC       | GAATGTACCATCGGTTGTTTCAAT                           |
| <i>pkbR1</i> T470A<br>point<br>mutation | pkbA_T470A_F  | pkbA_T470_R   | <b>GCT</b> TATGTAGCTGATTCAATCTTAAAG<br>G        | GAAACCTTCAAAGCTTGTATC                              |
